# Supplementary material for: A Wireless EEG System for Neurofeedback Training
Source: MDPI journal article supplement (doi:10.3390/app13010096), 2022-12-21
Supplement: s1 [file s1]

Archive with 3 entries (3 files):
- Supp Materials Visual training tasks.pdf
- Tables S1 Psychological results.pdf
- Tables S2 Behavioural results.pdf
