# Supplementary material for: A Wireless EEG System for Neurofeedback Training
Source: MDPI journal article supplement (doi:10.3390/app13010096), 2022-12-21
Supplement: s1 [file s1 › Tables S1 Psychological results.pdf]

## Supplementary Materials Table S1

### Wireless EEG system for neurofeedback training

Tsvetalin Totev <sup>1</sup>, Tihomir Taskov <sup>1</sup> and Juliana Dushanova <sup>1,\*</sup>

<sup>1</sup>Institute of Neurobiology, Bulgarian Academy of Sciences, Acad. G. Bonchev Str., bl. 23, 1113 Sofia and Bulgaria

**Table S1.** Psychological results of the groups in standard scores.

| <b>1. DDE-2 Test</b>         | <b>Dyslexics<br/>mean <math>\pm</math> s.d</b> | <b>Controls<br/>mean <math>\pm</math> s.d</b> |
|------------------------------|------------------------------------------------|-----------------------------------------------|
| 1.1.Word reading             |                                                |                                               |
| Accuracy                     | 90.6 $\pm$ 4.5                                 | 106 $\pm$ 5.58                                |
| time                         | 91.7 $\pm$ 4.8                                 | 132 $\pm$ 0.76                                |
| 1.2.Pseudo-word reading      |                                                |                                               |
| Accuracy                     | 88.3 $\pm$ 4.4                                 | 102 $\pm$ 4.65                                |
| time                         | 96.7 $\pm$ 4.1                                 | 118 $\pm$ 0.68                                |
| 1.3 Homonyms                 |                                                |                                               |
| Accuracy                     | 98.5 $\pm$ 2.4                                 | 112 $\pm$ 4.82                                |
| 1.4 Spelling                 |                                                |                                               |
| Accuracy                     | 112 $\pm$ 4.45                                 | 112 $\pm$ 1.82                                |
| 1.5 Word writing             |                                                |                                               |
| Accuracy                     | 85.7 $\pm$ 4.4                                 | 115 $\pm$ 6.49                                |
| 1.6 Pseudo-word writing      |                                                |                                               |
| Accuracy                     | 91.9 $\pm$ 3.9                                 | 104 $\pm$ 4.25                                |
| 1.7 Dictation                |                                                |                                               |
| Accuracy                     | 89.5 $\pm$ 3.4                                 | 112 $\pm$ 4.82                                |
| <b>2. Psychometric tests</b> | <b>Dyslexics<br/>mean <math>\pm</math> s.d</b> | <b>Control<br/>mean <math>\pm</math> s.d</b>  |
| 2.1 Dictation                |                                                |                                               |
| Correct sentences            | 10.94 $\pm$ 4.51                               | 21.00 $\pm$ 5.85                              |
| 2.2. Text reading            |                                                |                                               |
| Correct answers              | 119.75 $\pm$ 7.88                              | 129.41 $\pm$ 3.43                             |
| time (s)                     | 191.56 $\pm$ 149.55                            | 104.77 $\pm$ 29.00                            |
| 2.3 Phological task          |                                                |                                               |
| Without the first sound      |                                                |                                               |
| Correct                      | 5.52 $\pm$ 2.04                                | 9.20 $\pm$ 1.87                               |
| time (s)                     | 62.5 $\pm$ 29.4                                | 34.86 $\pm$ 10.57                             |
| 2.4 Phological task          |                                                |                                               |
| Without the last syllable    |                                                |                                               |
| Correct answers              | 6.15 $\pm$ 2.38                                | 8.05 $\pm$ 2.08                               |
| time                         | 64.84 $\pm$ 30.5                               | 37.50 $\pm$ 8.81                              |
| 3. Girolami-Bolinier         |                                                |                                               |
| Correct answers              | 50.9 $\pm$ 9.2                                 |                                               |
| 4. Raven test                | > 98                                           | > 98                                          |

Data are expressed as the mean  $\pm$  SD. One hundred-eight children: 72 children with dyslexia (52 boys and 20 girls, age 8.76  $\pm$  0.53 years) and 36 normal children (26 boys and 10 girls, age 8.8  $\pm$  0.36 years) from a

second grade of four primary schools located in the urban community of middle-level socio-economic status in Sofia, Bulgaria. The study was conducted in the schools. The children had a normal or corrected-to-normal vision after an examination by an ophthalmologist. All participants in the study spoke Bulgarian as their first language and were right-handed.

The school children pass through neuropsychological tests [1]. Psychological test battery DDE-2 was applied to examine developmental dyslexia [2,3]. Psychometric tests were used to assess reading, writing skills and phonological awareness [4]. For the children with learning difficulties, not only the Raven test for nonverbal intelligence "Progressive Matrices" [5] but also the Girolami-Boulinier test for non-verbal perception "Differently Oriented Marks" [6,7] was applied.

The first language of the participants was Bulgarian. The classification of hand preference [8] showed that all children had right-hand preferences. They were with normal or adjusted to normal vision. They scored  $\geq 98$  points in their nonverbal intelligence test [5]. Children who had difficulty reading, along with accuracy or speed in reading subtests of the DDE-2 battery and the "Reading Abilities" battery below the norm with a standard deviation of standardized data of normally reading children were included in the dyslexic group [4]. Children, participating in the study as controls, were recruited from the schools of the dyslexics. They were of the same age and socio-demographic background as the dyslexic group. They did not have dyslexia and concomitant language disorders, according to the accuracy and speed of reading in DD2 tests.

1. Raichev, P.; Geleva, T.; Valcheva, M.; Rasheva, M.; Raicheva, M. Protocol on neurological and neuropsychological studies of children with specific learning disabilities. In the "Integrated Learning and Resource Teacher" journal; Ed. "Dr. Ivan Bogorov" - Sofia. 2005 (in Bulgarian).
2. Matanova, V.; Todorova, E. DDE-2 Test Battery for evaluation of dyslexia of development - Bulgarian adaptation; OS Bulgaria Ltd. 2013, <https://www.giuntipsy.bg/bg/prod-19-testova-bateriq-za-ocenka-nadisleksiq-na-razvitiето.htm>.
3. Sartori, G.; Remo, J.; Tressoldi, P.E. Updated and revised edition for the evaluation of dyslexia. In *DDE-2, Battery for the Developmental Dyslexia and Evolutionary Disorders-2*, 1995, Giunti, O.S.: Florence, Italy, 2007.
4. Kalonkina, A.; Lalova, Y. Normative indicators for the test battery for a written speech assessment. In *Logopedical Diagnostics* (30-38); Tyubele, S., Iossifova, R., Eds.; Rommel Publishing House: Sofia, Bulgaria, 2016.
5. Raven, J.; Raven, J.C.; Court, J.H. *Manual for Raven's Progressive Matrices and Vocabulary Scales. Section 2: The Coloured Progressive Matrices*; Oxford Psychologists Press: Oxford, UK, 1998.
6. Girolami-Boulinier, A. *Contrôle des Aptitudes à la Lecture et à l'Écriture (CALE)*; CALE: Paris, Masson, 1985; (In French).
7. Yakimova, R. *Narusheniya na Pismenata rech. Abnormalities of Written Speech*; Rommel Publishing House: Sofia, Bulgaria, 2004. (In Bulgarian)
8. Annett, A. A classification of hand preference by association analysis. *Br J Psychol* 1970, 61, 303-321.
